# Supplementary material for: Aberrant Gene Expression in Humans
Source: PubMed Central journal article supplement (PMC4305293; doi:10.1371/journal.pgen.1004942), 2015-01-24
Supplement: pgen.1004942.s001.pdf [file pgen.1004942.s001.pdf]

|         | 1 | 2 | 3 | 4 | 5 | 6 | 7 | 8 | 9 | 10 | 11 | 12 | 13 | 14 | 15 | 16 | 17 | 18 | 19 | 20 | 21 | 22 | 23 | 24 | 25 | 26 | 27 | 28 | 29 | 30 | 31 |  |
|---------|---|---|---|---|---|---|---|---|---|----|----|----|----|----|----|----|----|----|----|----|----|----|----|----|----|----|----|----|----|----|----|--|
| HG00104 |   |   |   |   |   |   |   | ■ |   |    |    |    |    |    |    |    |    |    |    |    |    |    |    |    |    |    |    |    |    |    |    |  |
| HG00122 | ■ | ■ |   | ■ | ■ |   | ■ | ■ |   |    |    | ■  | ■  |    |    |    | ■  |    |    |    |    |    |    |    |    |    |    | ■  | ■  |    |    |  |
| HG00236 |   |   |   |   |   |   |   |   |   |    |    |    |    |    |    |    |    |    |    |    |    |    |    |    |    |    |    |    |    |    | ■  |  |
| HG00246 |   |   |   |   |   |   |   |   |   |    |    |    |    |    |    |    |    |    |    |    |    | ■  |    |    |    | ■  | ■  |    |    |    |    |  |
| HG00249 |   |   |   |   |   |   |   |   |   |    |    |    |    |    |    |    |    |    |    |    |    |    | ■  | ■  |    |    |    |    | ■  |    |    |  |
| HG00320 |   |   |   |   |   |   |   |   |   | ■  | ■  |    |    |    |    |    |    |    |    |    |    |    |    |    |    |    |    |    |    |    |    |  |
| HG01334 |   |   |   |   |   |   |   |   |   | ■  | ■  |    |    |    |    |    |    |    |    |    |    |    |    |    |    | ■  |    |    |    |    |    |  |
| NA11843 |   |   |   |   |   | ■ | ■ |   |   |    |    |    |    |    |    |    |    |    |    | ■  |    |    |    |    |    |    |    |    |    |    |    |  |
| NA11931 |   |   |   |   |   |   |   |   |   |    |    |    |    |    |    |    |    |    |    |    |    |    |    |    |    |    |    |    |    |    | ■  |  |
| NA11995 |   |   |   |   |   |   |   |   |   |    |    |    |    |    | ■  |    |    |    |    |    | ■  | ■  |    | ■  | ■  |    | ■  |    |    | ■  |    |  |
| NA12154 |   |   |   |   |   |   |   |   |   |    |    |    |    |    |    |    |    |    |    |    |    |    |    |    |    |    |    |    |    |    |    |  |
| NA12273 | ■ | ■ |   | ■ | ■ |   | ■ | ■ |   |    |    | ■  | ■  |    |    |    |    |    |    |    |    |    |    |    |    |    |    | ■  | ■  |    |    |  |
| NA12341 |   |   |   |   |   |   |   | ■ |   |    |    |    |    |    |    |    |    |    |    |    |    |    |    |    |    |    |    |    |    |    |    |  |
| NA12717 |   |   | ■ |   |   | ■ |   |   | ■ |    |    |    |    |    |    |    | ■  |    | ■  |    |    |    |    |    |    |    | ■  | ■  | ■  |    |    |  |
| NA12874 |   |   | ■ |   |   |   |   |   |   |    | ■  |    |    | ■  |    |    |    | ■  |    |    |    |    | ■  |    |    |    |    |    |    |    |    |  |
| NA12890 |   |   |   |   |   | ■ |   |   |   |    |    |    |    |    |    |    |    |    |    |    |    |    |    |    |    |    |    |    |    | ■  |    |  |
| NA20801 |   |   |   |   |   |   |   |   |   | ■  |    |    |    |    |    |    |    |    |    |    |    |    |    |    |    | ■  |    |    |    |    |    |  |
