# Supplementary material for: Aberrant Gene Expression in Humans
Source: PubMed Central journal article supplement (PMC4305293; doi:10.1371/journal.pgen.1004942), 2015-01-24

**A**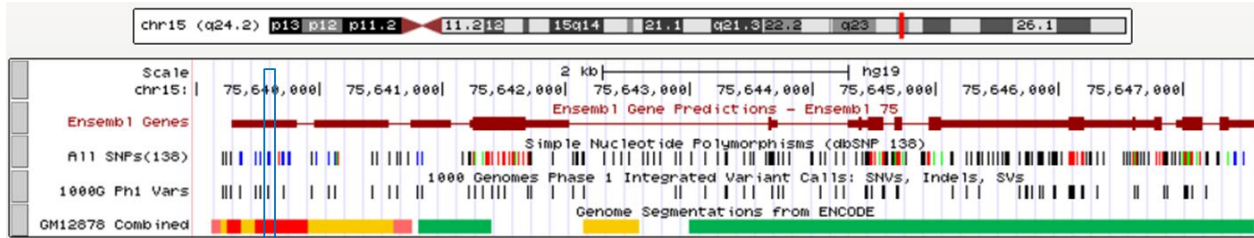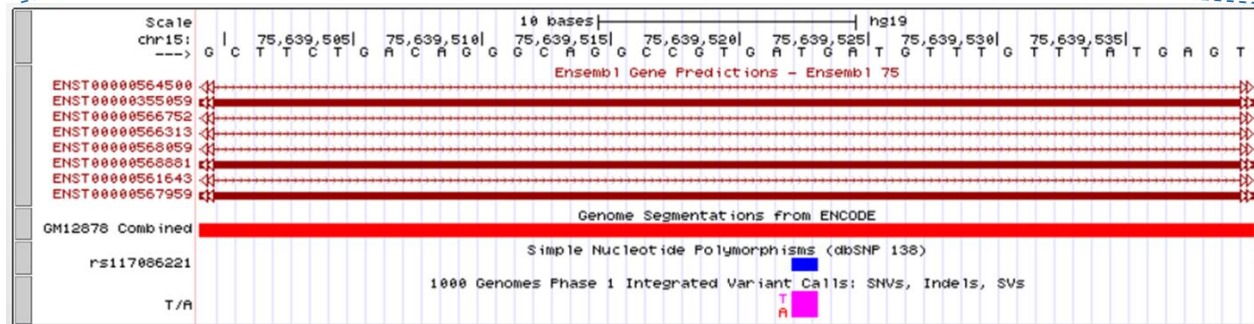**B**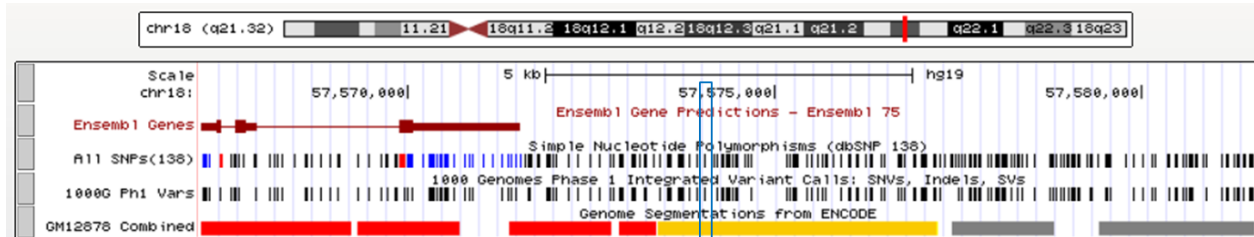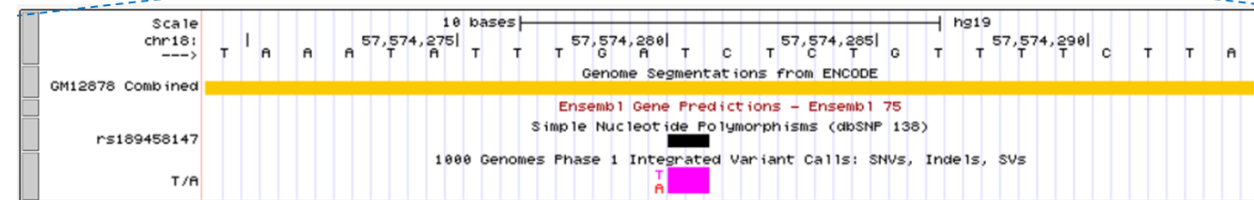

Supplement: pgen.1004942.s002.pdf [file pgen.1004942.s002.pdf]
