# Supplementary material for: Aberrant Gene Expression in Humans
Source: PubMed Central journal article supplement (PMC4305293; doi:10.1371/journal.pgen.1004942), 2015-01-24
Supplement: pgen.1004942.s004.pdf [file pgen.1004942.s004.pdf]

**Table S1.** GWAS gene sets that tend to be aberrantly expressed in LCLs of European descent.

| GWAS catalog gene set                                                                | Number of genes <sup>#</sup> |
|--------------------------------------------------------------------------------------|------------------------------|
| <b>Genes tend to be aberrantly expressed</b>                                         |                              |
| Adverse response to chemotherapy (neutropenia/leucopenia) (all platinum-based drugs) | 2 / 6                        |
| Conduct disorder (symptom count)                                                     | 4 / 7                        |
| Fasting insulin-related traits (interaction with BMI)                                | 15 / 21                      |
| Metabolite levels (Dihydroxy docosatrienoic acid)                                    | 7 / 20                       |
| Obesity (extreme)                                                                    | 10 / 18                      |
| Retinal vascular caliber                                                             | 14 / 18                      |
| Temperament                                                                          | 9 / 17                       |
| Thyroid hormone levels                                                               | 14 / 28                      |
| <b>Genes tend not to be aberrantly expressed</b>                                     |                              |
| Alcohol dependence                                                                   | 11 / 31                      |
| Metabolic syndrome                                                                   | 25 / 41                      |

<sup>#</sup>Number of genes included in SSMD estimation / Number of genes in the GWAS catalog gene set.
