# Supplementary material for: Aberrant Gene Expression in Humans
Source: PubMed Central journal article supplement (PMC4305293; doi:10.1371/journal.pgen.1004942), 2015-01-24
Supplement: pgen.1004942.s005.pdf [file pgen.1004942.s005.pdf]

**Table S2.** Gene sets with significant  $diffSSMD = SSMD_{EUR} - SSMD_{YRI}$ .

|                                                            | MSigDB gene set                                            | # of genes | # of genes used in SSMD | Observed SSMD |
|------------------------------------------------------------|------------------------------------------------------------|------------|-------------------------|---------------|
| <b>diffSSMD<sub>obs</sub> &gt; diffSSMD<sub>rand</sub></b> |                                                            |            |                         |               |
|                                                            | PHOTORECEPTOR_CELL_MAINTENANCE                             | 10         | 8                       | 13282.27      |
|                                                            | NIELSEN_MALIGNANT_FIBROUS_HISTIOCYTOMA_UP                  | 18         | 12                      | 8588.03       |
|                                                            | WALLACE_PROSTATE_CANCER_DN                                 | 6          | 4                       | 5203.44       |
|                                                            | BERGER_MBD2_TARGETS                                        | 7          | 2                       | 1003.57       |
| <b>diffSSMD<sub>obs</sub> &lt; diffSSMD<sub>rand</sub></b> |                                                            |            |                         |               |
|                                                            | GOLGI_MEMBRANE                                             | 45         | 43                      | 12167.03      |
|                                                            | VESICLE_COAT                                               | 16         | 15                      | 4060.43       |
|                                                            | INTEGRAL_TO_GOLGI_MEMBRANE                                 | 10         | 10                      | 2876.98       |
|                                                            | KINESIN_COMPLEX                                            | 14         | 13                      | 3482.33       |
|                                                            | GOLGI_APPARATUS_PART                                       | 100        | 94                      | 26243.37      |
|                                                            | ENDOCYTIC_VESICLE                                          | 14         | 11                      | 3066.16       |
|                                                            | COATED_VESICLE_MEMBRANE                                    | 17         | 15                      | 4060.43       |
|                                                            | TRANSPORT_VESICLE                                          | 33         | 28                      | 7491.02       |
|                                                            | INTEGRAL_TO_ORGANELLE_MEMBRANE                             | 50         | 48                      | 14317.3       |
|                                                            | MEMBRANE_COAT                                              | 17         | 16                      | 4325.21       |
|                                                            | TRANS_GOLGI_NETWORK                                        | 21         | 19                      | 4744.92       |
|                                                            | GOLGI_ASSOCIATED_VESICLE                                   | 29         | 26                      | 7170.73       |
|                                                            | INTRINSIC_TO_GOLGI_MEMBRANE                                | 15         | 15                      | 4531.93       |
|                                                            | COATED_MEMBRANE                                            | 17         | 16                      | 4325.21       |
|                                                            | TRANS_GOLGI_NETWORK_TRANSPORT_VESICLE                      | 13         | 12                      | 2874.72       |
|                                                            | PHOSPHOLIPID_BIOSYNTHETIC_PROCESS                          | 39         | 38                      | 9697.56       |
|                                                            | GLYCEROPHOSPHOLIPID_BIOSYNTHETIC_PROCESS                   | 30         | 29                      | 7703.07       |
|                                                            | GLYCOLIPID_METABOLIC_PROCESS                               | 16         | 15                      | 2599          |
|                                                            | VIRAL_GENOME_REPLICATION                                   | 21         | 18                      | 4830.73       |
|                                                            | PATTERN_SPECIFICATION_PROCESS                              | 31         | 20                      | 4631.62       |
|                                                            | RESPONSE_TO_TOXIN                                          | 10         | 7                       | 270.64        |
|                                                            | VIRAL_INFECTIOUS_CYCLE                                     | 32         | 26                      | 7117.43       |
|                                                            | VIRAL_REPRODUCTIVE_PROCESS                                 | 36         | 30                      | 8402.15       |
|                                                            | POST_GOLGI_VESICLE_MEDIATED_TRANSPORT                      | 14         | 14                      | 4122.54       |
|                                                            | MEMBRANE_LIPID_BIOSYNTHETIC_PROCESS                        | 49         | 47                      | 10606.59      |
|                                                            | RAS_PROTEIN_SIGNAL_TRANSDUCTION                            | 66         | 61                      | 9605.12       |
|                                                            | GLYCOSPHINGOLIPID_METABOLIC_PROCESS                        | 12         | 11                      | 1131.99       |
|                                                            | NEGATIVE_REGULATION_OF_MAP_KINASE_ACTIVITY                 | 17         | 15                      | 3907.94       |
|                                                            | GLYCEROPHOSPHOLIPID_METABOLIC_PROCESS                      | 46         | 44                      | 10876.91      |
|                                                            | ESTABLISHMENT_AND_OR_MAINTENANCE_OF_CELL_POLARITY          | 19         | 13                      | 3864.83       |
|                                                            | INACTIVATION_OF_MAPK_ACTIVITY                              | 14         | 12                      | 3095.47       |
|                                                            | SPHINGOLIPID_BIOSYNTHETIC_PROCESS                          | 10         | 9                       | 926           |
|                                                            | REGULATION_OF_RAS_GTPASE_ACTIVITY                          | 11         | 11                      | 3108          |
|                                                            | ACTIVE_TRANSMEMBRANE_TRANSPORTER_ACTIVITY                  | 122        | 91                      | 28148.17      |
|                                                            | SUGAR_BINDING                                              | 34         | 16                      | 4145.68       |
|                                                            | SPECIFIC_RNA_POLYMERASE_II_TRANSCRIPTION_FACTOR_ACTIVITY   | 35         | 31                      | 7741.1        |
|                                                            | SULFOTRANSFERASE_ACTIVITY                                  | 28         | 20                      | 5935.63       |
|                                                            | OXIDOREDUCTASE_ACTIVITY_ACTING_ON_PEROXIDE_AS_ACCEPTOR     | 12         | 12                      | 3329.06       |
|                                                            | NEUROPEPTIDE_BINDING                                       | 23         | 8                       | 1173.58       |
|                                                            | NEUROPEPTIDE_RECEPTOR_ACTIVITY                             | 22         | 8                       | 1173.58       |
|                                                            | NEUTRAL_AMINO_ACID_TRANSMEMBRANE_TRANSPORTER_ACTIVITY      | 12         | 7                       | 1776.72       |
|                                                            | PEPTIDE_BINDING                                            | 85         | 51                      | 16039.52      |
|                                                            | ACETYLGLUCOSAMINYLTRANSFERASE_ACTIVITY                     | 16         | 15                      | 2975.02       |
|                                                            | NF_KAPPAB_BINDING                                          | 11         | 11                      | 2975.53       |
|                                                            | ACTIN_FILAMENT_BINDING                                     | 25         | 25                      | 6998.07       |
|                                                            | TRANSFERASE_ACTIVITY_TRANSFERRING_PENTOSYL_GROUPS          | 20         | 17                      | 5162.21       |
|                                                            | TRANSFERASE_ACTIVITY_TRANSFERRING_SULFUR_CONTAINING_GROUPS | 32         | 24                      | 6177.74       |
|                                                            | CARBOXYLIC_ACID_TRANSMEMBRANE_TRANSPORTER_ACTIVITY         | 44         | 27                      | 7153.4        |
|                                                            | GALACTOSYLTRANSFERASE_ACTIVITY                             | 16         | 14                      | 3551.61       |
|                                                            | AAGWWRNYGGC_UNKNOWN                                        | 119        | 107                     | 28387.78      |
|                                                            | AGCYRWTTTC_UNKNOWN                                         | 122        | 87                      | 16729.68      |
|                                                            | ATGGYGGA_UNKNOWN                                           | 102        | 92                      | 28125.28      |
|                                                            | CCTNTMAGA_UNKNOWN                                          | 127        | 102                     | 32811.66      |
|                                                            | ACTACCT,MIR-196A,MIR-196B                                  | 145        | 113                     | 31626.25      |
|                                                            | KMCATNNWGGA_UNKNOWN                                        | 90         | 77                      | 21122.92      |

|                                                                             |     |     |          |
|-----------------------------------------------------------------------------|-----|-----|----------|
| RRCCGTTA_UNKNOWN                                                            | 87  | 74  | 23615.87 |
| SNACANNYSYAGA_UNKNOWN                                                       | 90  | 79  | 19106.18 |
| TGTYNNNNRGCARM_UNKNOWN                                                      | 86  | 68  | 23086.7  |
| TNCATNTCCYR_UNKNOWN                                                         | 131 | 117 | 33594.9  |
| MORF_TERF2IP                                                                | 112 | 110 | 32561.32 |
| MORF_PAPSS1                                                                 | 101 | 100 | 29472.36 |
| MORF_RUNX1                                                                  | 150 | 117 | 34955.63 |
| MORF_SS18                                                                   | 61  | 59  | 17950.71 |
| GCM_ERBB2IP                                                                 | 64  | 61  | 19546.33 |
| GCM_BMPR2                                                                   | 84  | 80  | 22228.1  |
| GNF2_ATM                                                                    | 30  | 28  | 8025.4   |
| GNF2_CASP4                                                                  | 24  | 24  | 6469.52  |
| GNF2_MSN                                                                    | 24  | 24  | 6571.8   |
| GNF2_PAK2                                                                   | 28  | 28  | 7839.01  |
| GNF2_PTPN4                                                                  | 51  | 40  | 6740.23  |
| GNF2_PTPRC                                                                  | 68  | 67  | 20342.76 |
| GNF2_RAP1B                                                                  | 36  | 36  | 10316.35 |
| GNF2_SNRK                                                                   | 28  | 27  | 7832.82  |
| GNF2_STAT6                                                                  | 79  | 79  | 23979.37 |
| KEGG_GLYCOLYSIS_GLUONEOGENESIS                                              | 62  | 53  | 15518.48 |
| KEGG_FATTY_ACID_METABOLISM                                                  | 42  | 33  | 8919.33  |
| KEGG_GLYCEROPHOSPHOLIPID_METABOLISM                                         | 77  | 64  | 19703.59 |
| KEGG_GLYCOSPHINGOLIPID_BIOSYNTHESIS_LACTO_AND_NEOLACTO_SERIES               | 26  | 21  | 5234.08  |
| KEGG_GLYCOSPHINGOLIPID_BIOSYNTHESIS_GLOBO_SERIES                            | 14  | 12  | 1593.52  |
| KEGG_GLYCOSPHINGOLIPID_BIOSYNTHESIS_GANGLIO_SERIES                          | 15  | 14  | 2324.53  |
| KEGG_PROPANOATE_METABOLISM                                                  | 33  | 31  | 8209.5   |
| KEGG_BIOSYNTHESIS_OF_UNSATURATED_FATTY_ACIDS                                | 22  | 22  | 5115.46  |
| KEGG_PROSTATE_CANCER                                                        | 89  | 83  | 22999.38 |
| BIOCARTA_BLYMPHOCYTE_PATHWAY                                                | 11  | 11  | 2853.81  |
| BIOCARTA_IL4_PATHWAY                                                        | 11  | 11  | 2993.47  |
| BIOCARTA_MCALPAIN_PATHWAY                                                   | 25  | 23  | 7087.18  |
| BIOCARTA_PPARA_PATHWAY                                                      | 58  | 48  | 5427.65  |
| BIOCARTA_P38MAPK_PATHWAY                                                    | 40  | 39  | 11738.56 |
| BIOCARTA_PML_PATHWAY                                                        | 17  | 16  | 4053.62  |
| BIOCARTA_TEL_PATHWAY                                                        | 18  | 18  | 6510.63  |
| BIOCARTA_ACTINY_PATHWAY                                                     | 20  | 19  | 5278.7   |
| chr1p11                                                                     | 11  | 4   | 720.08   |
| chr8p23                                                                     | 201 | 39  | 13126.04 |
| chr9q32                                                                     | 45  | 26  | 6788.69  |
| chrXq13                                                                     | 102 | 43  | 12290.93 |
| chr9p22                                                                     | 61  | 18  | 3732.1   |
| chr2q35                                                                     | 66  | 44  | 10933.41 |
| MODULE_89                                                                   | 14  | 13  | 3134.48  |
| MODULE_90                                                                   | 17  | 15  | 3334.59  |
| MODULE_168                                                                  | 22  | 22  | 5893.79  |
| MODULE_182                                                                  | 101 | 88  | 26595.14 |
| MODULE_189                                                                  | 23  | 22  | 5163.49  |
| MODULE_203                                                                  | 16  | 14  | 3340.15  |
| MODULE_235                                                                  | 81  | 70  | 16624.16 |
| MODULE_239                                                                  | 120 | 114 | 32611.37 |
| MODULE_261                                                                  | 101 | 91  | 27362.39 |
| MODULE_432                                                                  | 15  | 14  | 3771.95  |
| MODULE_464                                                                  | 14  | 13  | 3639.27  |
| MODULE_519                                                                  | 15  | 13  | 3244.43  |
| MODULE_543                                                                  | 17  | 13  | 3082.26  |
| MODULE_552                                                                  | 18  | 18  | 4693.43  |
| PID_TELOMERASEPATHWAY                                                       | 68  | 67  | 19612.91 |
| PID_HEDGEHOG_GLIPATHWAY                                                     | 48  | 46  | 12508.48 |
| PID_TGFBRPATHWAY                                                            | 55  | 50  | 14630.74 |
| REACTOME_GLYCOGEN_BREAKDOWN_GLYCOGENOLYSIS                                  | 18  | 15  | 3997.26  |
| REACTOME_PYRIMIDINE_CATABOLISM                                              | 12  | 9   | 549.45   |
| REACTOME_TETRAHYDROBIOPTERIN_BH4_SYNTHESIS_RECYCLING_SALVAGE_AND_REGULATION | 13  | 11  | 3080.34  |
| REACTOME_PROTEOLYTIC_CLEAVAGE_OF_SNARE_COMPLEX_PROTEINS                     | 17  | 15  | 4213.4   |
| REACTOME_ALPHA_LINOLENIC_ACID_ALA_METABOLISM                                | 12  | 11  | 1871.36  |

|                                                                 |     |     |          |
|-----------------------------------------------------------------|-----|-----|----------|
| REACTOME_ELEVATION_OF_CYTOSOLIC_CA2_LEVELS                      | 10  | 5   | 1053.85  |
| REACTOME_METABOLISM_OF_NUCLEOTIDES                              | 72  | 66  | 18322.99 |
| REACTOME_SPHINGOLIPID_METABOLISM                                | 69  | 59  | 18781.85 |
| REACTOME_RECYCLING_PATHWAY_OF_L1                                | 27  | 26  | 7619.25  |
| REACTOME_AMINO_ACID_SYNTHESIS_AND_INTERCONVERSION_TRANSMINATION | 17  | 16  | 4254.72  |
| REACTOME_TRANSPORT_TO_THE_GOLGI_AND_SUBSEQUENT_MODIFICATION     | 33  | 29  | 7564.11  |
| REACTOME_N_GLYCAN_ANTENNAE_ELONGATION                           | 14  | 10  | 2384.54  |
| REACTOME_KINESINS                                               | 24  | 22  | 5924.76  |
| REACTOME_N_GLYCAN_ANTENNAE_ELONGATION_IN_THE_MEDIAL_TRANS_GOLGI | 18  | 14  | 3433.84  |
| REACTOME_CHOLESTEROL_BIOSYNTHESIS                               | 24  | 21  | 5678.3   |
| REACTOME_PYRIMIDINE_METABOLISM                                  | 24  | 21  | 3657.69  |
| ZHONG_RESPONSE_TO_AZACITIDINE_AND_TSA_DN                        | 70  | 65  | 19101    |
| LIU_VMYB_TARGETS_UP                                             | 127 | 113 | 32555.06 |
| NEWMAN_ERCC6_TARGETS_UP                                         | 26  | 21  | 6248.71  |
| RODRIGUES_DCC_TARGETS_DN                                        | 121 | 112 | 35789.78 |
| VECCHI_GASTRIC_CANCER_ADVANCED_VS_EARLY_DN                      | 138 | 93  | 16508    |
| TIEN_INTESTINE_PROBIOTICS_2HR_DN                                | 88  | 85  | 22303.09 |
| KIM_WT1_TARGETS_8HR_DN                                          | 129 | 103 | 31243.64 |
| LAU_APOPTOSIS_CDKN2A_DN                                         | 5   | 4   | 973.36   |
| CASTELLANO_HRAS_TARGETS_DN                                      | 6   | 6   | 957.56   |
| CASTELLANO_HRAS_AND_NRAS_TARGETS_DN                             | 8   | 7   | 1114.4   |
| WANG_BARRETTES_ESOPHAGUS_UP                                     | 51  | 37  | 10187.32 |
| LUCAS_HNF4A_TARGETS_UP                                          | 58  | 49  | 9702.12  |
| KLEIN_TARGETS_OF_BCR_ABL1_FUSION                                | 45  | 40  | 11652.34 |
| IWANAGA_E2F1_TARGETS_NOT_INDUCED_BY_SERUM                       | 6   | 6   | 1392.35  |
| MYLLYKANGAS_AMPLIFICATION_HOT_SPOT_29                           | 11  | 4   | 1207.76  |
| MYLLYKANGAS_AMPLIFICATION_HOT_SPOT_18                           | 8   | 5   | 1279.71  |
| BOWIE_RESPONSE_TO_TAMOXIFEN                                     | 18  | 18  | -1176.29 |
| DAUER_STAT3_TARGETS_DN                                          | 50  | 48  | 10800.47 |
| KORKOLA_TERATOMA                                                | 39  | 27  | 7927.57  |
| TERAMOTO_OPN_TARGETS_CLUSTER_3                                  | 5   | 4   | 1049.74  |
| TERAMOTO_OPN_TARGETS_CLUSTER_5                                  | 7   | 7   | 1684.51  |
| HEIDENBLAD_AMPLICON_12P11_12_DN                                 | 30  | 20  | 4203.83  |
| MURATA_VIRULENCE_OF_H_PILORI                                    | 24  | 20  | 5763.69  |
| MAINA_VHL_TARGETS_DN                                            | 18  | 14  | 2702.83  |
| THEODOROU_MAMMARY_TUMORIGENESIS                                 | 31  | 15  | 3597.49  |
| KAUFFMANN_MELANOMA_RELAPSE_UP                                   | 61  | 59  | 16517.77 |
| GROSS_ELK3_TARGETS_DN                                           | 32  | 25  | 7547.74  |
| SCHAEFFER_PROSTATE_DEVELOPMENT_AND_CANCER_BOX6_DN               | 5   | 2   | 443.28   |
| COURTOIS_SENESCENCE_TRIGGERS                                    | 6   | 6   | 1479.96  |
| RICKMAN_HEAD_AND_NECK_CANCER_D                                  | 37  | 21  | 7500.37  |
| MORI_LARGE_PRE_BII_LYMPHOCYTE_DN                                | 58  | 56  | 16464.52 |
| MORI_MATURE_B_LYMPHOCYTE_UP                                     | 90  | 86  | 26604.64 |
| NIKOLSKY_BREAST_CANCER_1Q32_AMPLICON                            | 13  | 12  | 3293.55  |
| BYSTRYKH_SCP2_QTL                                               | 6   | 4   | 619.58   |
| KLEIN_PRIMARY_EFFUSION_LYMPHOMA_DN                              | 58  | 55  | 15315.08 |
| PARK_HSC_VS_MULTIPOTENT_PROGENITORS_UP                          | 19  | 18  | 4654.95  |
| SHIPP_DLCL_VS_FOLLICULAR_LYMPHOMA_DN                            | 45  | 40  | 9414.39  |
| REN_BOUND_BY_E2F                                                | 61  | 61  | 18365.62 |
| GALINDO_IMMUNE_RESPONSE_TO_ENTEROTOXIN                          | 85  | 81  | 26394.45 |
| FAELT_B_CLL_WITH_VH_REARRANGEMENTS_UP                           | 48  | 48  | 12734.2  |
| NEMETH_INFLAMMATORY_RESPONSE_LPS_UP                             | 88  | 82  | 24735.13 |
| XU_RESPONSE_TO_TRETINOIN_UP                                     | 16  | 14  | 3396.55  |
| GREENBAUM_E2A_TARGETS_UP                                        | 33  | 32  | 8452.65  |
| ZHANG_RESPONSE_TO_CANTHARIDIN_UP                                | 19  | 17  | 4657.55  |
| BROWNE_INTERFERON_RESPONSIVE_GENES                              | 68  | 64  | 13894.72 |
| DASU_IL6_SIGNALING_SCAR_UP                                      | 30  | 27  | 8056.83  |
| CHIBA_RESPONSE_TO_TSA                                           | 50  | 42  | 12412.14 |
| EHRlich_ICF_SYNDROM_DN                                          | 15  | 14  | 3931.79  |
| WEIGEL_OXIDATIVE_STRESS_BY_HNE_AND_TBH                          | 60  | 53  | 16019.48 |
| ZHU_CMV_24_HR_UP                                                | 93  | 90  | 23697.2  |
| NIELSEN_LEIOMYOSARCOMA_UP                                       | 18  | 14  | -602.41  |
| GENTILE_UV_RESPONSE_CLUSTER_D8                                  | 40  | 38  | 10431.4  |

|                                                             |     |     |          |
|-------------------------------------------------------------|-----|-----|----------|
| GENTILE_RESPONSE_CLUSTER_D3                                 | 61  | 59  | 17748.07 |
| TSENG_ADIPOGENIC_POTENTIAL_UP                               | 30  | 22  | 6353.8   |
| DURCHDEWALD_SKIN_CARCIANOGENESIS_UP                         | 88  | 68  | 20112.66 |
| GAVIN_FOXP3_TARGETS_CLUSTER_T4                              | 94  | 88  | 27334.62 |
| GAVIN_IL2_RESPONSIVE_FOXP3_TARGETS_DN                       | 5   | 4   | 749.06   |
| MCGOWAN_RSP6_TARGETS_DN                                     | 5   | 5   | 1094.58  |
| MOSERLE_IFNA_RESPONSE                                       | 31  | 31  | 9180.06  |
| BERNARD_PPAPDC1B_TARGETS_UP                                 | 40  | 35  | 10925.22 |
| CHUNG_BLISTER_CYTOTOXICITY_DN                               | 44  | 41  | 11565.73 |
| SHARMA_PILOCYTIC_ASTROCYTOMA_LOCATION_DN                    | 7   | 4   | 1182.49  |
| HUANG_DASATINIB_RESISTANCE_DN                               | 69  | 59  | 12873.63 |
| CHAUHAN_RESPONSE_TO_METHOXYESTRADIOL_DN                     | 102 | 98  | 29003.88 |
| MARTINELLI_IMMATURE_NEUTROPHIL_UP                           | 11  | 3   | 372.46   |
| HOFFMANN_SMALL_PRE_BII_TO_IMMATURE_B_LYMPHOCYTE_UP          | 70  | 63  | 19582.94 |
| LEE_EARLY_T_LYMPHOCYTE_DN                                   | 57  | 51  | 15821.05 |
| SHEDDEN_LUNG_CANCER_GOOD_SURVIVAL_A5                        | 70  | 58  | 16674.65 |
| FERRANDO_HOX11_NEIGHBORS                                    | 23  | 18  | 5263.15  |
| ZHAN_EARLY_DIFFERENTIATION_GENES_DN                         | 42  | 40  | 11082.27 |
| MILI_PSEUDOPODIA                                            | 43  | 43  | 12697.83 |
| IRITANI_MAD1_TARGETS_UP                                     | 13  | 9   | 1018.97  |
| ZHAN_LATE_DIFFERENTIATION_GENES_DN                          | 16  | 15  | 3173.69  |
| BOYALT_LIVER_CANCER_SUBCLASS_G1_DN                          | 40  | 37  | 11819.47 |
| CHIANG_LIVER_CANCER_SUBCLASS_UNANNOTATED_UP                 | 85  | 68  | 20471.15 |
| MIKKELSEN_IPS_ICP_WITH_H3K27ME3                             | 54  | 27  | 9328.12  |
| MARSON_FOXP3_TARGETS_DN                                     | 54  | 49  | 14468.09 |
| WINNEPENNINGKX_MELANOMA_METASTASIS_DN                       | 46  | 26  | -728.51  |
| TSAI_DNAJB4_TARGETS_UP                                      | 13  | 12  | 3266.59  |
| ZHAN_MULTIPLE_MYELOMA_CD1_DN                                | 45  | 42  | 12073.8  |
| KYNG_RESPONSE_TO_H2O2_VIA_ERCC6_DN                          | 46  | 43  | 10219.1  |
| DAZARD_UV_RESPONSE_CLUSTER_G24                              | 28  | 19  | -944.96  |
| RUAN_RESPONSE_TO_TROGLITAZONE_DN                            | 19  | 14  | 3535.99  |
| KIM_ALL_DISORDERS_DURATION_CORR_UP                          | 9   | 7   | 1825.02  |
| JOHNSTONE_PARVB_TARGETS_1_DN                                | 63  | 50  | 6177.03  |
| DELPUECH_FOXP3_TARGETS_UP                                   | 68  | 62  | 18823.22 |
| KASLER_HDAC7_TARGETS_2_DN                                   | 32  | 30  | 8681.28  |
| JUBAN_TARGETS_OF_SPI1_AND_FLI1_UP                           | 115 | 107 | 32090.64 |
| KOHOUTEK_CCNT2_TARGETS                                      | 58  | 39  | 11809.4  |
| LE_NEURONAL_DIFFERENTIATION_DN                              | 19  | 17  | 4403.91  |
| HOLLEMAN_ASPARAGINASE_RESISTANCE_ALL_DN                     | 25  | 23  | 6467.86  |
| SMIRNOV_RESPONSE_TO_IR_2HR_DN                               | 55  | 54  | 15749.72 |
| BCAT_BILD_ET_AL_DN                                          | 46  | 44  | 13511.4  |
| EIF4E_UP                                                    | 100 | 79  | 24878.26 |
| PDGF_ERK_DN.V1_DN                                           | 149 | 129 | 38457.45 |
| HORTON_SREBF_TARGETS                                        | 25  | 23  | 6436.94  |
| GSE15659_NAIVE_CD4_TCELL_VS_RESTING_TREG_UP                 | 200 | 146 | 27222.29 |
| GSE15659_NAIVE_CD4_TCELL_VS_ACTIVATED_TREG_UP               | 200 | 133 | 36038.03 |
| GSE15659_RESTING_VS_ACTIVATED_TREG_UP                       | 200 | 120 | 22963.11 |
| GSE17974_IL4_AND_ANTI_IL12_VS_UNTREATED_1H_ACT_CD4_TCELL_UP | 200 | 113 | 34236.76 |
| GSE34205_HEALTHY_VS_RSV_INF_INFANT_PBMCDN                   | 200 | 148 | 42489.3  |
