# Supplementary material for: Aberrant Gene Expression in Humans
Source: PubMed Central journal article supplement (PMC4305293; doi:10.1371/journal.pgen.1004942), 2015-01-24
Supplement: pgen.1004942.s006.pdf [file pgen.1004942.s006.pdf]

**Table S3.** *P*-values of Kolmogorov-Smirnov test for the normalized relative mean difference (RMD) between “L-SSMD” and “S-SSMD” genes in monozygotic (MZ) and dizygotic (DZ) twins.

|           | DZ S-SSMD | MZ outlier | DZ L-SSMD |
|-----------|-----------|------------|-----------|
| MZ S-SSMD | 5.42E-06  | 2.47E-15   | 2.21E-64  |
| DZ S-SSMD |           | 3.60E-04   | 3.00E-34  |
| MZ L-SSMD |           |            | 5.59E-23  |
